# Supplementary material for: MiR-141-3p overexpression suppresses the malignancy of osteosarcoma by targeting FUS to degrade LDHB
Source: Oxford University Press journal article supplement (doi:10.1042/bsr20193404), 2020-06-01
Supplement: bsr-2019-3404_supp.pdf [file bsr-2019-3404_supp.pdf]

**Figure S1**

**A**

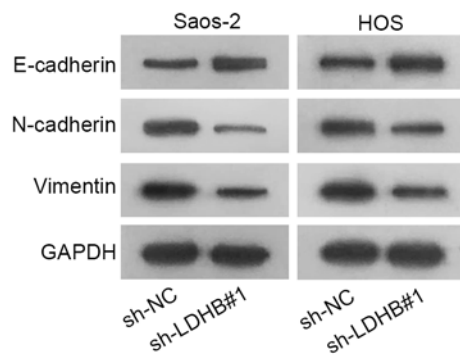

**Figure S1 The effect of LDHB silence on EMT process**

(A) Western blot assay measured expressions of EMT-related proteins in each group.
